# Supplementary material for: Examining the Lancet Commission risk factors for dementia using Mendelian randomisation
Source: PubMed Central journal article supplement — BMJ Ment Health. 2023 Feb 6;26(1):e300555. doi: 10.1136/bmjment-2022-300555 (PMC10035779; doi:10.1136/bmjment-2022-300555), 2023-02-06
Supplement: bmjment-2022-300555supp001.pdf [file bmjment-2022-300555supp001.pdf]

Supplementary Table 1: MR results with AD as outcome using four different GWAS for AD

| Data Sets                                   |                              | IVW estimate          |                     |              |           |           |         | MR Egger estimate |           |           |         | Weighted median MR estimate |           |           |         | Heterogeneity statistics |                    |         |                |
|---------------------------------------------|------------------------------|-----------------------|---------------------|--------------|-----------|-----------|---------|-------------------|-----------|-----------|---------|-----------------------------|-----------|-----------|---------|--------------------------|--------------------|---------|----------------|
| Exposure & Dataset                          | Outcome & Dataset            | Number of Instruments | Instrument Strenght | IVW estimate | 95% CI LB | 95% CI UB | p-value | MR Egger estimate | 95% CI LB | 95% CI UB | p-value | Weighted median MR estimate | 95% CI LB | 95% CI UB | p-value | Cochran's Q              | Degrees of freedom | p-value | I <sup>2</sup> |
| Education Okby et al., 2016                 | Bellenguez et al., 2022      | 70                    | 45.793              | 0.657        | 0.049     | 1.265     | 0.034   | 0.306             | -2.765    | 3.378     | 0.845   | 0.464                       | -0.221    | 1.149     | 0.184   | 138.398                  | 69                 | >.00001 | 50.1%          |
|                                             | Kunkle et al., 2019          | 72                    | 45.650              | -1.135       | -2.121    | -0.149    | 0.024   | -2.483            | -7.556    | 2.590     | 0.337   | -1.299                      | -2.441    | -0.158    | 0.026   | 121.596                  | 71                 | 0.000   | 41.6%          |
|                                             | Lambert et al., 2013         | 71                    | 45.818              | -1.488       | -2.441    | -0.536    | 0.002   | -3.618            | -8.842    | 1.605     | 0.175   | -1.187                      | -2.455    | 0.080     | 0.066   | 89.283                   | 70                 | 0.060   | 21.6%          |
|                                             | Schwarzentruber et al., 2021 | 72                    | 45.686              | 0.694        | 0.111     | 1.277     | 0.020   | -0.769            | -3.725    | 2.187     | 0.610   | 0.494                       | -0.250    | 1.239     | 0.193   | 98.699                   | 71                 | 0.017   | 28.1%          |
| Alcohol consumption et al., 2019            | Bellenguez et al., 2022      | 72                    | 60.889              | 0.170        | -0.167    | 0.507     | 0.323   | 0.011             | -0.542    | 0.563     | 0.969   | 0.063                       | -0.275    | 0.401     | 0.715   | 183.606                  | 71                 | >.00001 | 61.3%          |
|                                             | Kunkle et al., 2019          | 73                    | 61.287              | -0.071       | -0.180    | 0.038     | 0.201   | 0.944             | -3.823    | 5.711     | 0.698   | -0.078                      | -0.204    | 0.048     | 0.226   | 127.835                  | 72                 | 0.000   | 43.7%          |
|                                             | Lambert et al., 2013         | 70                    | 61.204              | -0.024       | -0.594    | 0.545     | 0.933   | 0.001             | -0.941    | 0.943     | 0.999   | -0.352                      | -1.042    | 0.339     | 0.318   | 119.991                  | 69                 | 0.000   | 42.5%          |
|                                             | Schwarzentruber et al., 2021 | 73                    | 61.264              | 0.233        | -0.117    | 0.582     | 0.192   | -0.022            | -0.624    | 0.580     | 0.943   | -0.138                      | -0.573    | 0.297     | 0.533   | 137.708                  | 72                 | >.00001 | 47.7%          |
| BMI Pulit et al., 2018                      | Bellenguez et al., 2022      | 542                   | 55.264              | -0.139       | -0.200    | -0.079    | 0.000   | -0.165            | -0.321    | -0.009    | 0.038   | -0.171                      | -0.264    | -0.078    | 0.000   | 870.906                  | 541                | >.00001 | 37.9%          |
|                                             | Kunkle et al., 2019          | 544                   | 55.368              | -0.184       | -0.433    | 0.066     | 0.149   | -0.749            | -1.394    | -0.105    | 0.023   | -0.110                      | -0.268    | 0.048     | 0.173   | 4736.082                 | 543                | >.00001 | 88.5%          |
|                                             | Lambert et al., 2013         | 538                   | 55.433              | -0.054       | -0.281    | 0.172     | 0.639   | -0.538            | -1.131    | 0.055     | 0.076   | 0.029                       | -0.158    | 0.216     | 0.760   | 3106.162                 | 537                | >.00001 | 82.7%          |
|                                             | Schwarzentruber et al., 2021 | 544                   | 55.359              | -0.287       | -0.515    | -0.059    | 0.014   | -0.572            | -1.161    | 0.017     | 0.057   | -0.126                      | -0.220    | -0.031    | 0.009   | 9183.831                 | 543                | >.00001 | 94.1%          |
| Systolic Blood Pressure UKBB                | Bellenguez et al., 2022      | 219                   | 45.411              | -0.106       | -0.204    | -0.008    | 0.035   | -0.100            | -0.408    | 0.209     | 0.527   | -0.166                      | -0.273    | -0.058    | 0.002   | 472.711                  | 218                | >.00001 | 53.9%          |
|                                             | Kunkle et al., 2019          | 218                   | 45.262              | -0.128       | -0.269    | 0.012     | 0.074   | -0.180            | -0.628    | 0.267     | 0.430   | -0.073                      | -0.258    | 0.113     | 0.443   | 306.713                  | 217                | 0.000   | 29.2%          |
|                                             | Lambert et al., 2013         | 217                   | 45.240              | -0.157       | -0.305    | -0.008    | 0.038   | -0.270            | -0.747    | 0.206     | 0.266   | -0.160                      | -0.368    | 0.047     | 0.130   | 275.843                  | 216                | 0.004   | 21.7%          |
|                                             | Schwarzentruber et al., 2021 | 218                   | 45.268              | -0.217       | -0.320    | -0.113    | 0.000   | -0.270            | -0.599    | 0.059     | 0.108   | -0.273                      | -0.396    | -0.149    | 0.000   | 386.483                  | 217                | >.00001 | 43.9%          |
| Age related hearing loss Kalra et al., 2020 | Bellenguez et al., 2022      | 30                    | 43.403              | 0.061        | -0.165    | 0.287     | 0.598   | 0.723             | -0.152    | 1.598     | 0.105   | 0.052                       | -0.235    | 0.339     | 0.721   | 37.267                   | 29                 | 0.140   | 22.2%          |
|                                             | Kunkle et al., 2019          | 30                    | 43.392              | 0.026        | -0.333    | 0.385     | 0.889   | -0.223            | -1.809    | 1.364     | 0.783   | -0.144                      | -0.651    | 0.364     | 0.579   | 20.179                   | 29                 | 0.887   | 0.0%           |
|                                             | Lambert et al., 2013         | 28                    | 43.462              | 0.038        | -0.370    | 0.445     | 0.856   | -0.440            | -2.568    | 1.689     | 0.686   | 0.090                       | -0.470    | 0.651     | 0.752   | 26.100                   | 27                 | 0.513   | 0.0%           |
|                                             | Schwarzentruber et al., 2021 | 30                    | 43.369              | -0.115       | -0.387    | 0.157     | 0.407   | -0.403            | -1.537    | 0.731     | 0.486   | -0.178                      | -0.523    | 0.167     | 0.312   | 39.495                   | 29                 | 0.093   | 26.6%          |
| Depression Howard et al., 2019              | Bellenguez et al., 2022      | 76                    | 42.782              | 0.016        | -0.086    | 0.119     | 0.752   | -0.361            | -0.924    | 0.202     | 0.209   | 0.029                       | -0.090    | 0.148     | 0.637   | 125.995                  | 75                 | 0.000   | 40.5%          |
|                                             | Kunkle et al., 2019          | 79                    | 42.426              | -0.167       | -0.332    | -0.001    | 0.049   | -0.854            | -1.786    | 0.078     | 0.072   | -0.201                      | -0.408    | 0.006     | 0.057   | 113.362                  | 78                 | 0.006   | 31.2%          |
|                                             | Lambert et al., 2013         | 78                    | 42.430              | -0.116       | -0.285    | 0.053     | 0.180   | -0.776            | -1.719    | 0.167     | 0.107   | -0.109                      | -0.338    | 0.120     | 0.351   | 93.851                   | 77                 | 0.093   | 18.0%          |
|                                             | Schwarzentruber et al., 2021 | 79                    | 42.426              | -0.068       | -0.190    | 0.054     | 0.274   | -0.414            | -1.093    | 0.265     | 0.232   | -0.046                      | -0.185    | 0.093     | 0.517   | 141.493                  | 78                 | >.00001 | 44.9%          |
| Type 2 Diabetes, Scott et al., 2017         | Bellenguez et al., 2022      | 39                    | 62.187              | 0.006        | -0.036    | 0.049     | 0.776   | -0.009            | -0.123    | 0.104     | 0.871   | -0.013                      | -0.061    | 0.035     | 0.596   | 95.862                   | 38                 | >.00001 | 60.4%          |
|                                             | Kunkle et al., 2019          | 40                    | 61.953              | -0.201       | -0.679    | 0.278     | 0.411   | -0.332            | -1.614    | 0.951     | 0.612   | -0.006                      | -0.085    | 0.073     | 0.887   | 4047.441                 | 39                 | >.00001 | 99.0%          |
|                                             | Lambert et al., 2013         | 40                    | 62.226              | -0.101       | -0.523    | 0.320     | 0.638   | -0.247            | -1.371    | 0.877     | 0.667   | -0.007                      | -0.091    | 0.076     | 0.862   | 2524.884                 | 39                 | >.00001 | 98.5%          |
|                                             | Schwarzentruber et al., 2021 | 40                    | 62.013              | -0.200       | -0.654    | 0.255     | 0.389   | -0.271            | -1.499    | 0.957     | 0.665   | 0.005                       | -0.044    | 0.053     | 0.851   | 8393.471                 | 39                 | >.00001 | 99.5%          |
| Loneliness Day et al., 2019                 | Bellenguez et al., 2022      | 15                    | 36.105              | 0.206        | -0.270    | 0.682     | 0.396   | -0.814            | -3.230    | 1.603     | 0.509   | 0.081                       | -0.395    | 0.557     | 0.738   | 29.810                   | 14                 | 0.008   | 53.0%          |
|                                             | Kunkle et al., 2019          | 15                    | 36.097              | 0.045        | -1.114    | 1.204     | 0.939   | 0.479             | -5.663    | 6.620     | 0.879   | -0.390                      | -1.232    | 0.453     | 0.365   | 54.771                   | 14                 | >.00001 | 74.4%          |
|                                             | Lambert et al., 2013         | 14                    | 36.131              | 0.195        | -0.885    | 1.274     | 0.723   | 0.786             | -5.414    | 6.987     | 0.804   | -0.396                      | -1.345    | 0.553     | 0.413   | 34.207                   | 13                 | 0.001   | 62.0%          |
|                                             | Schwarzentruber et al., 2021 | 15                    | 36.083              | -0.146       | -0.827    | 0.534     | 0.674   | -1.611            | -5.074    | 1.852     | 0.362   | -0.328                      | -0.853    | 0.196     | 0.220   | 44.367                   | 14                 | 0.000   | 68.4%          |
| Physical Activity Klimentidis et al., 2018  | Bellenguez et al., 2022      | 7                     | 37.958              | -0.724       | -2.279    | 0.832     | 0.362   | 5.031             | -8.337    | 18.399    | 0.461   | -0.197                      | -1.395    | 1.001     | 0.748   | 28.695                   | 6                  | 0.000   | 79.1%          |
|                                             | Kunkle et al., 2019          | 7                     | 37.952              | -0.012       | -1.512    | 1.489     | 0.988   | -5.161            | -18.158   | 7.836     | 0.436   | -0.188                      | -1.909    | 1.532     | 0.830   | 8.553                    | 6                  | 0.200   | 29.8%          |
|                                             | Lambert et al., 2013         | 7                     | 38.362              | -0.747       | -2.516    | 1.021     | 0.407   | -5.295            | -21.854   | 11.265    | 0.531   | -0.942                      | -2.880    | 0.995     | 0.340   | 9.466                    | 6                  | 0.149   | 36.6%          |
|                                             | Schwarzentruber et al., 2021 | 7                     | 37.952              | -0.293       | -1.441    | 0.854     | 0.617   | -3.783            | -13.894   | 6.328     | 0.463   | -0.272                      | -1.419    | 0.876     | 0.643   | 11.361                   | 6                  | 0.078   | 47.2%          |
| Smoking Wootton et al., 2019                | Bellenguez et al., 2022      | 126                   | 42.693              | -0.229       | -0.372    | -0.086    | 0.002   | -0.719            | -1.286    | -0.152    | 0.013   | -0.169                      | -0.339    | 0.000     | 0.050   | 221.479                  | 125                | >.00001 | 43.6%          |
|                                             | Kunkle et al., 2019          | 126                   | 42.617              | -0.037       | -0.259    | 0.185     | 0.746   | -0.794            | -1.691    | 0.102     | 0.082   | -0.042                      | -0.336    | 0.252     | 0.781   | 169.390                  | 125                | 0.005   | 26.2%          |
|                                             | Lambert et al., 2013         | 125                   | 42.533              | 0.039        | -0.218    | 0.295     | 0.767   | -0.555            | -1.640    | 0.530     | 0.316   | 0.022                       | -0.310    | 0.355     | 0.896   | 181.590                  | 124                | 0.001   | 31.7%          |
|                                             | Schwarzentruber et al., 2021 | 126                   | 42.625              | -0.316       | -0.477    | -0.154    | 0.000   | -0.713            | -1.361    | -0.066    | 0.031   | -0.342                      | -0.538    | -0.146    | 0.001   | 208.446                  | 125                | >.00001 | 40.0%          |

Supplementary Table2: MR results with DLB as outcome

| Data Sets                                         |                       |                       |                     | IVW estimate |        |        |         | MR Egger estimate |         |        |         | Weighted median MR estimate |        |       |         | Heterogeneity statistics |         |         |                |
|---------------------------------------------------|-----------------------|-----------------------|---------------------|--------------|--------|--------|---------|-------------------|---------|--------|---------|-----------------------------|--------|-------|---------|--------------------------|---------|---------|----------------|
| Exposure & Dataset                                | Outcome & Dataset     | Number of Instruments | Instrument Strenght | IVW estimate | 95% CI |        | p-value | MR Egger          | 95% CI  |        | p-value | Weighted median MR estimate | 95% CI |       | p-value | Degrees of freedom       |         |         |                |
|                                                   |                       |                       |                     |              | LB     | UB     |         |                   | LB      | UB     |         |                             | LB     | UB    |         | Cochran's Q              | freedom | p-value | I <sup>2</sup> |
| Education Okbay et al., 2016                      | DLB Chia et al., 2021 | 67                    | 45.517              | 0.688        | -1.411 | 2.787  | 0.521   | -1.338            | -11.753 | 9.077  | 0.801   | 2.185                       | -0.741 | 5.111 | 0.143   | 73.913                   | 66      | 0.236   | 10.7%          |
| Alcohol Consumption Evangelou et al., 2019        | DLB Chia et al., 2021 | 69                    | 58.002              | -0.515       | -1.737 | 0.706  | 0.408   | 0.222             | -3.588  | 4.033  | 0.909   | -1.217                      | -3.102 | 0.667 | 0.205   | 71.462                   | 68      | 0.364   | 48.0%          |
| Body Mass Index Pultit et al., 2018               | DLB Chia et al., 2021 | 538                   | 55.504              | -0.286       | -0.565 | -0.006 | 0.045   | -0.563            | -1.289  | 0.163  | 0.129   | -0.024                      | -0.406 | 0.359 | 0.904   | 881.655                  | 537     | >.00001 | 39.1%          |
| Systolic Blood Pressure UK BioBank                | DLB Chia et al., 2021 | 213                   | 45.574              | 0.110        | -0.196 | 0.416  | 0.481   | -0.380            | -1.367  | 0.607  | 0.451   | 0.002                       | -0.461 | 0.464 | 0.994   | 204.133                  | 212     | 0.639   | 0.0%           |
| Age-related hearing impairment Kalra et al., 2020 | DLB Chia et al., 2021 | 29                    | 43.436              | -0.282       | -1.193 | 0.630  | 0.545   | -2.504            | -6.182  | 1.174  | 0.182   | -0.606                      | -1.875 | 0.664 | 0.350   | 25.491                   | 28      | 0.601   | 0.0%           |
| Depression Howard et al., 2019                    | DLB Chia et al., 2021 | 71                    | 42.191              | -0.008       | -0.452 | 0.437  | 0.972   | 0.965             | -1.579  | 3.510  | 0.457   | -0.314                      | -0.899 | 0.270 | 0.292   | 94.768                   | 70      | 0.026   | 26.1%          |
| Type 2 Diabetes,Scott et al., 2017                | DLB Chia et al., 2021 | 38                    | 62.483              | 0.024        | -0.149 | 0.197  | 0.784   | 0.027             | -0.420  | 0.473  | 0.907   | 0.048                       | -0.168 | 0.265 | 0.661   | 27.353                   | 37      | 0.877   | 0.0%           |
| Loneliness Day et al., 2019                       | DLB Chia et al., 2021 | 14                    | 34.957              | -1.524       | -3.434 | 0.387  | 0.118   | -1.575            | -11.135 | 7.985  | 0.747   | -1.811                      | -3.988 | 0.367 | 0.103   | 20.702                   | 13      | 0.079   | 37.2%          |
| Physical Activity Klimentidis et al., 2018        | DLB Chia et al., 2021 | 7                     | 38.048              | -2.679       | -7.705 | 2.347  | 0.296   | -17.324           | -61.638 | 26.990 | 0.444   | -3.330                      | -8.120 | 1.459 | 0.173   | 14.169                   | 6       | 0.028   | 57.7%          |
| Smoking Wootton et al., 2019                      | DLB Chia et al., 2021 | 119                   | 42.782              | -0.181       | -0.717 | 0.354  | 0.507   | -0.159            | -2.248  | 1.930  | 0.881   | -0.417                      | -1.165 | 0.331 | 0.275   | 134.921                  | 118     | 0.137   | 12.5%          |

Supplementary Table 3: MR results with FTD as outcome

| Data Sets                                         |                          |                       |                     | IVW estimate |           |           |         | MR Egger estimate |           |           |         | Weighted median MR estimate |           |           |         | Heterogeneity statistics |                    |         |                |
|---------------------------------------------------|--------------------------|-----------------------|---------------------|--------------|-----------|-----------|---------|-------------------|-----------|-----------|---------|-----------------------------|-----------|-----------|---------|--------------------------|--------------------|---------|----------------|
| Exposure & Dataset                                | Outcome & Dataset        | Number of Instruments | Instrument Strenght | IVW estimate | 95% CI LB | 95% CI UB | p-value | MR Egger          | 95% CI LB | 95% CI UB | p-value | Weighted median MR estimate | 95% CI LB | 95% CI UB | p-value | Cochran's Q              | Degrees of freedom | p-value | I <sup>2</sup> |
| Education Okbay et al., 2016                      | FTD Ferreri et al., 2014 | 71                    | 45.976              | 1.044        | -1.427    | 3.514     | 0.408   | -7.489            | -21.785   | 6.807     | 0.305   | 0.326                       | -2.989    | 3.641     | 0.847   | 84.386                   | 70                 | 0.116   | 17.0%          |
| Alcohol Consumption Evangelou et al., 2019        | FTD Ferreri et al., 2014 | 65                    | 61.944              | 0.431        | -0.664    | 1.526     | 0.440   | 0.557             | -1.164    | 2.278     | 0.526   | 0.124                       | -1.543    | 1.791     | 0.884   | 62.995                   | 64                 | 0.512   | 0.0%           |
| Body Mass Index Pultit et al., 2018               | FTD Ferreri et al., 2014 | 525                   | 55.268              | -0.287       | -0.540    | -0.034    | 0.026   | -0.318            | -0.976    | 0.340     | 0.344   | -0.191                      | -0.649    | 0.268     | 0.415   | 543.364                  | 524                | 0.270   | 3.6%           |
| Systolic Blood Pressure UK BioBank                | FTD Ferreri et al., 2014 | 212                   | 45.081              | -0.047       | -0.406    | 0.312     | 0.798   | 0.165             | -1.005    | 1.335     | 0.782   | 0.106                       | -0.431    | 0.642     | 0.700   | 222.056                  | 211                | 0.287   | 5.0%           |
| Age-related hearing impairment Kalra et al., 2020 | FTD Ferreri et al., 2014 | 26                    | 43.494              | -0.111       | -1.201    | 0.979     | 0.842   | -1.268            | -8.039    | 5.503     | 0.714   | -0.342                      | -1.899    | 1.216     | 0.667   | 26.110                   | 25                 | 0.402   | 4.3%           |
| Depression Howard et al., 2019                    | FTD Ferreri et al., 2014 | 78                    | 41.904              | 0.004        | -0.411    | 0.420     | 0.983   | -0.561            | -2.827    | 1.705     | 0.627   | 0.083                       | -0.506    | 0.672     | 0.782   | 79.237                   | 77                 | 0.408   | 2.8%           |
| Type 2 Diabetes Scott et al., 2017                | FTD Ferreri et al., 2014 | 38                    | 62.478              | 0.024        | -0.149    | 0.197     | 0.784   | 0.027             | -0.420    | 0.473     | 0.907   | 0.048                       | -0.168    | 0.265     | 0.661   | 59.181                   | 37                 | 0.012   | 37.5%          |
| Loneliness Day et al., 2019                       | FTD Ferreri et al., 2014 | 14                    | 36.429              | 1.334        | -0.390    | 3.059     | 0.129   | 0.760             | -8.418    | 9.938     | 0.871   | 0.816                       | -1.588    | 3.219     | 0.506   | 12.524                   | 13                 | 0.483   | 0.0%           |
| Physical Activity Klimentidis et al., 2018        | FTD Ferreri et al., 2014 | 7                     | 38.177              | 1.520        | -2.158    | 5.198     | 0.418   | 10.857            | -20.400   | 42.114    | 0.496   | 0.885                       | -4.058    | 5.829     | 0.726   | 6.080                    | 6                  | 0.414   | 1.3%           |
| Smoking Wootton et al., 2019                      | FTD Ferreri et al., 2014 | 123                   | 42.593              | -0.344       | -0.973    | 0.284     | 0.283   | 0.458             | -2.180    | 3.097     | 0.733   | -0.116                      | -0.970    | 0.738     | 0.790   | 153.749                  | 122                | 0.027   | 20.6%          |

Supplementary Table 4: Additional sample statistics

| Dataset                                     | Meta-analyses? | Heterogeneity statistics |                         | Maximum number of participants | Maximum exposure sample overlaps with outcome sample population |                     |                      |                               |                           |                           |                         |
|---------------------------------------------|----------------|--------------------------|-------------------------|--------------------------------|-----------------------------------------------------------------|---------------------|----------------------|-------------------------------|---------------------------|---------------------------|-------------------------|
|                                             |                | p-value                  | I <sup>2</sup>          |                                | Alzheimer's Disease                                             |                     |                      |                               | Dementia with Lewy Bodies | Frontotemporal Dementia   | Coronary Artery Disease |
|                                             |                |                          |                         |                                | Bellenguez et al., 2022                                         | Kunkle et al., 2019 | Lambert et al., 2013 | Schwartzentruber et al., 2022 | DLB: Chia et al., 2021    | FTD: Ferreri et al., 2014 | Nelson et al., 2017     |
| Education Okbay et al., 2016                | Yes            | >.05                     | ranged from 0.0 to 38.3 | 293723                         | 2.6%                                                            | 0.0%                | 0.0%                 | 0.0%                          | 0.0%                      | N/A                       |                         |
| Alcohol consumption et al., 2019            | Yes            | >.05                     | ranged from 0.0 to 77.8 | 480842                         | 80.6%                                                           | 0.0%                | 0.0%                 | 89.6%                         | 0.0%                      | N/A                       |                         |
| BMI Pulit et al., 2018                      | No             | -                        | -                       | 694649                         | 55.8%                                                           | 0.0%                | 0.0%                 | 62.0%                         | 0.0%                      | 100.0%                    |                         |
| Systolic Blood Pressure UKBB                | No             | -                        | -                       | 475142                         | 81.6%                                                           | 0.0%                | 0.0%                 | 90.7%                         | 0.0%                      | 100.0%                    |                         |
| Age related hearing loss Kalra et al., 2020 | No             | -                        | -                       | 330759                         | 100.0%                                                          | 0.0%                | 0.0%                 | 100.0%                        | 0.0%                      | N/A                       |                         |
| Depression Howard et al., 2019              | No             | -                        | -                       | 322580                         | 100.0%                                                          | 0.0%                | 0.0%                 | 100.0%                        | 0.0%                      | N/A                       |                         |
| Type 2 Diabetes, Scott et al., 2017         | Yes            |                          |                         | 159208                         | 3.7%                                                            | 0.0%                | 0.0%                 | 0.0%                          | 0.0%                      | N/A                       |                         |
| Loneliness Day et al., 2019                 | No             | -                        | -                       | 452302                         | 85.7%                                                           | 0.0%                | 0.0%                 | 95.3%                         | 0.0%                      | N/A                       |                         |
| Physical Activity Klimentidis et al., 2018  | No             | -                        | -                       | 377234                         | 100.0%                                                          | 0.0%                | 0.0%                 | 100.0%                        | 0.0%                      | N/A                       |                         |
| Smoking Wootton et al., 2019                | No             | -                        | -                       | 462690                         | 83.8%                                                           | 0.0%                | 0.0%                 | 93.2%                         | 0.0%                      | 100.0%                    |                         |
