# Supplementary material for: Examining the Lancet Commission risk factors for dementia using Mendelian randomisation
Source: PubMed Central journal article supplement — BMJ Ment Health. 2023 Feb 6;26(1):e300555. doi: 10.1136/bmjment-2022-300555 (PMC10035779; doi:10.1136/bmjment-2022-300555), 2023-02-06
Supplement: bmjment-2022-300555supp003.pdf [file bmjment-2022-300555supp003.pdf]

## STROBE-MR Checklist of Recommended Items to Address in Reports of Mendelian Randomization Studies

| Item No      | Section                            | Checklist item                                                                                                                                                                                                                      | Addressed? | Response                                                                                                                                                                                                                                                                                     |
|--------------|------------------------------------|-------------------------------------------------------------------------------------------------------------------------------------------------------------------------------------------------------------------------------------|------------|----------------------------------------------------------------------------------------------------------------------------------------------------------------------------------------------------------------------------------------------------------------------------------------------|
| Introduction |                                    |                                                                                                                                                                                                                                     |            |                                                                                                                                                                                                                                                                                              |
| 1            | Title and abstract                 | Indicate mendelian randomization (MR) as the study's design in the title and/or abstract if that is the main purpose of the study                                                                                                   | Yes        | The title includes the term mendelian randomization and makes it clear that this is the purpose of the study:<br>"Examining the Lancet Commission Risk Factors for Dementia Using Mendelian Randomization"<br>The abstract also makes clear that the purpose of the study is an MR analysis. |
| 2            | Background                         | Explain the scientific background and rationale for the reported study. What is the exposure? Is a potential causal relationship between exposure and outcome plausible? Justify why MR is a helpful method to address the question | Yes        | The introduction constructs a logical argument as to why MR is a helpful method and an appropriate tool for this study.                                                                                                                                                                      |
| 3            | Objectives                         | State specific objectives clearly including prespecified causal hypotheses (if any). State that MR is a method, that under specific assumptions intends to estimate causal effects.                                                 | Yes        | Objectives of the study are laid out in the last paragraph of the introduction. In the last sentence of the penultimate paragraph of the introduction we state that MR can be used to test causal assumptions given certain assumptions are met.                                             |
| Methods      |                                    |                                                                                                                                                                                                                                     |            |                                                                                                                                                                                                                                                                                              |
| 4            | Study design and data sources      | Present key elements of the study design early in the article. Consider including a table listing sources of data for all phases of the study. For each data source contributing to the analysis, describe the following:           | Yes        | See Table 1.                                                                                                                                                                                                                                                                                 |
|              | a                                  | Setting: Describe the study design and the underlying population, if possible. Describe the setting, locations and relevant dates, including periods of recruitment, exposure, follow-up and data collection, when available.       | Yes        | See Table 1 – details of population structure included.                                                                                                                                                                                                                                      |
|              | b                                  | Participants: Report the eligibility criteria and the sources and methods of selection of participants. Report the sample size and whether any power or sample size calculations were carried out prior to the main analysis.       | Yes        | Max number of participants included in Table 1.                                                                                                                                                                                                                                              |
|              | c                                  | Describe measurement, quality control and selection of genetic variants.                                                                                                                                                            |            |                                                                                                                                                                                                                                                                                              |
|              | d                                  | For each exposure, outcome, and other relevant variables, describe methods of assessment and diagnostic criteria for diseases.                                                                                                      | Yes        | Described in Table 1.                                                                                                                                                                                                                                                                        |
|              | e                                  | Provide details of ethics committee approval and participant informed consent, if relevant.                                                                                                                                         | NA         | All the ethics committee approval and participant consent details are provided in the original studies which have been referenced.                                                                                                                                                           |
| 5            | Assumptions                        | Explicitly state the 3-core instrumental variable (IV) assumptions for the main analysis (relevance, independence, and exclusion restriction) as well assumptions for any sensitivity analysis.                                     | Yes        | The three assumptions are stated in the introduction section                                                                                                                                                                                                                                 |
| 6            | Statistical methods: main analysis | Describe statistical methods and statistics used.                                                                                                                                                                                   | Yes        | Included in methods sections                                                                                                                                                                                                                                                                 |
|              | a                                  | Describe how quantitative variables were handled in the analyses (i.e.                                                                                                                                                              | Yes        | Included in methods section                                                                                                                                                                                                                                                                  |

|    |                                              |                                                                                                                                                                                                                                                                     |     |                                                                                                              |
|----|----------------------------------------------|---------------------------------------------------------------------------------------------------------------------------------------------------------------------------------------------------------------------------------------------------------------------|-----|--------------------------------------------------------------------------------------------------------------|
|    |                                              | scale, units, model).                                                                                                                                                                                                                                               |     |                                                                                                              |
|    | b                                            | Describe how genetic variants were handled in the analyses and if, applicable, how their weights were selected.                                                                                                                                                     | Yes | Included in methods section                                                                                  |
|    | c                                            | Describe the MR estimator (e.g. 2-stage least squares, Wald ratio) and related statistics. Detail the included covariates and, in the case of 2-sample MR, whether the same covariate set was used for adjustment in the 2 samples.                                 | Yes | Included in methods section                                                                                  |
|    | d                                            | Explain how missing data were addressed.                                                                                                                                                                                                                            | No  | Reported in the all the source papers cited in the report.                                                   |
|    | e                                            | If applicable, indicate how multiple testing was addressed.                                                                                                                                                                                                         | Yes | Included in methods section                                                                                  |
| 7  | Assessment of assumptions                    | Describe any methods or prior knowledge used to assess the assumptions or justify their validity.                                                                                                                                                                   |     |                                                                                                              |
| 8  | Sensitivity analyses and additional analyses | Describe any sensitivity analyses or additional analyses performed (e.g. comparison of effect estimates from different approaches, independent replication, bias analytic techniques, validation of instruments, simulations).                                      | Yes | Included in methods section                                                                                  |
| 9  | Software and preregistration                 |                                                                                                                                                                                                                                                                     |     |                                                                                                              |
|    | a                                            | Name of statistical software and package (s), including version and settings used.                                                                                                                                                                                  | Yes | Included in methods section                                                                                  |
|    | b                                            | State whether the study protocol and details were preregistered (as well as when and where).                                                                                                                                                                        | NA  | Not registered                                                                                               |
|    | Results                                      |                                                                                                                                                                                                                                                                     |     |                                                                                                              |
| 10 | Descriptive data                             |                                                                                                                                                                                                                                                                     |     |                                                                                                              |
|    | a                                            | Report the numbers of individuals at each state of included studies and reasons for exclusion. Consider use of a flow diagram.                                                                                                                                      | Yes | Number of participants reported in Table 1 exact flow of participants can be obtained from the cited papers. |
|    | b                                            | Report summary statistics for phenotypic exposure(s), outcome(s), and other relevant variables (e.g. means, SDs proportions).                                                                                                                                       | Yes | Reported in Table 1                                                                                          |
|    | c                                            | If the data sources include meta-analyses of previous studies, provide the assessments of heterogeneity across these studies.                                                                                                                                       | Yes | Reported in Supplementary materials                                                                          |
|    | d                                            | For 2-sample MR:<br>i. Provide justification of the similarity of the genetic variant-exposure associations between the exposure and outcome samples.<br>ii. Provide information on the number of individuals who overlap between the exposure and outcome studies. | Yes | Reported in Supplementary materials                                                                          |
| 11 | Main results                                 |                                                                                                                                                                                                                                                                     |     |                                                                                                              |
|    | a                                            | Report the associations between genetic variant and exposure and between genetic variant and outcome, preferably on an interpretable scale.                                                                                                                         | Yes | Reported in results section and supplementary materials                                                      |
|    | b                                            | Report MR estimates of the relationship between exposure and outcome and measures of uncertainty from the MR analysis, on an interpretable scale, such as odds ratio or relative risk per SD difference.                                                            | Yes | MR estimates have been transformed to odds ratio with a 95% confidence interval. See results sections.       |

|    |                                              |                                                                                                                                                                                                                                                                                                                                                   |     |                                                                                                                                     |
|----|----------------------------------------------|---------------------------------------------------------------------------------------------------------------------------------------------------------------------------------------------------------------------------------------------------------------------------------------------------------------------------------------------------|-----|-------------------------------------------------------------------------------------------------------------------------------------|
|    | c                                            | If relevant consider translating estimates of relative risk into absolute risk for a meaningful time period.                                                                                                                                                                                                                                      | N/A |                                                                                                                                     |
|    | d                                            | Consider plots to visualise results (e.g. forest plot, scatterplot of associations between genetic variants and outcome vs between genetic variants and exposure).                                                                                                                                                                                | Yes | Forest plots included in results section                                                                                            |
| 12 | Assessment of assumptions                    |                                                                                                                                                                                                                                                                                                                                                   |     |                                                                                                                                     |
|    | a                                            | Report the assessment of the validity of the assumptions.                                                                                                                                                                                                                                                                                         |     | F statistics reported as well as the results from the additional MR tests.                                                          |
|    | b                                            | Report any additional statistics (e.g., assessments of heterogeneity across variants, such as $I^2$ , Q statistic or E-value).                                                                                                                                                                                                                    | Yes | The Q and $I^2$ are reported in the Supplementary file.                                                                             |
| 13 | Sensitivity analyses and additional analyses |                                                                                                                                                                                                                                                                                                                                                   |     |                                                                                                                                     |
|    | a                                            | Report any sensitivity analyses to assess the robustness of the main results to violations of the assumptions.                                                                                                                                                                                                                                    | Yes | Sensitivity analysis using MR-Egger and weighted median were conducted. Reported in Supplementary file.                             |
|    | b                                            | Report results from other sensitivity analyses or additional analyses.                                                                                                                                                                                                                                                                            | Yes | Additional post-hoc analyses were conducted and reported in the main results section.                                               |
|    | c                                            | Report any assessment of the direction of the causal relationship (e.g. bidirectional MR).                                                                                                                                                                                                                                                        | NA  | Bidirectionality not assessed in the current study.                                                                                 |
|    | d                                            | When relevant, report and compare with estimates from non-MR analyses.                                                                                                                                                                                                                                                                            | Yes | The Lancet commission on dementia was referenced.                                                                                   |
|    | e                                            | Consider additional plots visualize results (e.g., leave-one-out analyses).                                                                                                                                                                                                                                                                       | NA  | Not conducted.                                                                                                                      |
|    | Discussion                                   |                                                                                                                                                                                                                                                                                                                                                   |     |                                                                                                                                     |
| 14 | Key results                                  | Summarize key results with reference to study objectives.                                                                                                                                                                                                                                                                                         | Yes | First paragraph of discussion.                                                                                                      |
| 15 | Limitations                                  | Discuss limitations of the study, taking into account the validity of the IV assumptions, other sources of bias, and imprecision. Discuss both direction and magnitude of any potential bias and any efforts to address them.                                                                                                                     | Yes | Limitations of MR analyses addressed with specific regard to survivor bias.                                                         |
| 16 | Interpretation                               |                                                                                                                                                                                                                                                                                                                                                   |     |                                                                                                                                     |
|    | a                                            | Meaning: Give a cautions overall interpretation of results in the context of their limitations and in comparison, with other studies.                                                                                                                                                                                                             | Yes | See discussion section.                                                                                                             |
|    | b                                            | Mechanism: Discuss underlying biological mechanisms that could drive a potential causal relationship between investigated exposure and the outcome, and whether the gene-environment equivalence assumption is reasonable. Use causal language carefully, clarifying that IV estimates may provide causal effects only under certain assumptions. | NA  | We did not find robust evidence for causal relationships therefore not applicable.                                                  |
|    | c                                            | Clinical relevance: Discuss whether the results have clinical or public policy relevance, and to what extent they inform effect sizes of possible interventions.                                                                                                                                                                                  | Yes | We discuss the value of incorporating the results of MR studies into large reviews of the literature such as the Lancet commission. |
| 17 | Generalizability                             | Discuss the generalizability of the study results (a) to other populations, (b) across other exposure periods/timings, and (c) across other levels of exposure.                                                                                                                                                                                   | NA  | Generalizability discussed in the limitations section of the discussion section                                                     |

|    | Other Information     |                                                                                                                                                                                                                                                                                             |     |                          |
|----|-----------------------|---------------------------------------------------------------------------------------------------------------------------------------------------------------------------------------------------------------------------------------------------------------------------------------------|-----|--------------------------|
| 18 | Funding               | Describe sources of funding and the role of funders in the present study and, if applicable, sources of funding and original study or studies on which the present study is based.                                                                                                          | NA  | N/A                      |
| 19 | Data and data sharing | Provide the data used to perform all analyses or report where and how the data can be accessed and reference these sources in the article. Provide the statistical code needed to reproduce the results in the article or report whether the code is publicly accessible and, if so, where. | Yes | Code available on GitHub |
| 20 | Conflicts of interest | All authors should declare all potential conflicts of interest.                                                                                                                                                                                                                             | Yes | COI declared             |
